# Supplementary material for: Nitrous acid (HONO) as a sink of the simplest Criegee intermediate in the atmosphere
Source: Royal Society of Chemistry journal article supplement (doi:10.1039/d1cp03605j), 2022-01-01
Supplement: d1cp03605j1.pdf [file d1cp03605j1.pdf]

**Supplementary Information for**  
**Nitrous acid (HONO) as a sink of simplest**  
**Criegee intermediate in the atmosphere**

Amit Kumar, Subhasish Mallick, and Pradeep Kumar\*

*Department of Chemistry, Malaviya National Institute of Technology Jaipur, Jaipur,  
302017, India*

E-mail: [pradeep.chy@mnit.ac.in](mailto:pradeep.chy@mnit.ac.in)

**Sl. No.****Contents**

1. **Table S1:** Coordinates (in angstrom) and frequencies (in  $\text{cm}^{-1}$ ) of all the important geometries of  $\text{CH}_2\text{OO} + \text{HONO}$  reaction optimized at M062-2X/aug-cc-pVTZ level of theory.
2. **Table S2:** Absolute energy of the relevant species estimated at CCSD(T)/aug-cc-pVTZ//M06-2X/aug-cc-pVTZ level of theory
3. **Table S3:** ZCT tunneling coefficient for  $\text{CH}_2\text{OO} + \text{HONO}$  reaction within the temperature range of 213-320 K.
4. **Table S4:** T1-Diagnostic values for the different TS involved in the  $\text{CH}_2\text{OO} + \text{HONO}$  reaction, calculated at CCSD(T)/aug-cc-pVTZ level of theory.
5. **Table S5:** Comparison of the energies of the HAT reaction obtained after including full T correction with the energies obtained at CCSD(T)/aug-cc-pVTZ level of theory.
6. **Table S6:** Equilibrium constants for the cis-trans-isomerization of HONO.
7. **Figure S1:** Gibbs free energy profile for  $\text{CH}_2\text{OO} + \text{trans-HONO}$  reaction, calculated at CCSD(T)/aug-cc-pVTZ//M06-2X/aug-cc-pVTZ level of theory.
8. **Figure S2:** Gibbs free energy profile for  $\text{CH}_2\text{OO} + \text{cis-HONO}$  reaction, calculated at CCSD(T)/aug-cc-pVTZ//M06-2X/aug-cc-pVTZ level of theory.

Table S1: Coordinates (in angstrom) and frequencies (in  $\text{cm}^{-1}$ ) of all the important geometries of  $\text{CH}_2\text{OO} + \text{HONO}$  reaction optimized at M062-2X/aug-cc-pVTZ level of theory.

| Species                | Coordinates                     | Frequencies                   |
|------------------------|---------------------------------|-------------------------------|
| $\text{CH}_2\text{OO}$ | O 1.167175 0.19252 0            |                               |
|                        | O -0.006869 -0.459323 0         | 538.6581 697.4377 930.256     |
|                        | C -1.054273 0.20301 0           | 1022.0054 1261.2468 1432.3163 |
|                        | H -1.971952 -0.368537 0         | 1628.3226 3140.2607 3291.8233 |
|                        | H -0.984853 1.284902 0          |                               |
| Cis-HONO               | N 0.160978 -0.516104 -0.000056  |                               |
|                        | O -1.07062 0.068769 0.000054    | 685.9664 702.3739 968.0504    |
|                        | O 1.044674 0.253693 0.000031    | 1372.3672 1783.8467 3662.3849 |
|                        | H -0.919279 1.033028 -0.000287  |                               |
| Trans-HONO             | N 0.162635 0.481149 0.000012    |                               |
|                        | O -1.017717 -0.254818 0.00001   | 566.847 699.1352 903.683      |
|                        | O 1.089014 -0.218665 -0.000009  | 1336.9243 1838.851 3831.4679  |
|                        | H -1.708816 0.419817 -0.000084  |                               |
| $\text{TS}_{cis}^{ot}$ | O 0.504986 0.229388 0.029806    |                               |
|                        | O 2.143078 0.541864 -0.229448   | -663.2394 16.6105 58.8595     |
|                        | C 2.801427 -0.39967 0.136987    | 88.6021 220.2522 318.9889     |
|                        | H 3.89075 -0.360345 0.040246    | 374.8122 498.61 556.1574      |
|                        | H 2.303624 -1.276792 0.559109   | 672.3375 717.1119 995.7475    |
|                        | N -1.32616 -0.15476 0.11097     | 1200.43 1248.0297 1388.5809   |
|                        | O -2.115365 0.944601 0.100379   | 1477.4521 1770.0265 1812.061  |
|                        | O -1.871835 -1.155374 -0.157086 | 3036.7296 3150.0167 3669.7239 |

Table S1 continued from previous page

|                                   |   |           |           |           |           |           |           |
|-----------------------------------|---|-----------|-----------|-----------|-----------|-----------|-----------|
|                                   | H | -3.00673  | 0.63465   | -0.147271 |           |           |           |
| TS <sub>trans</sub> <sup>ot</sup> | O | 0.473191  | 0.076115  | -0.000471 |           |           |           |
|                                   | O | 2.113655  | 0.518639  | -0.000206 | -620.5418 | 44.2227   | 109.8342  |
|                                   | C | 2.793548  | -0.477741 | 0.000358  | 118.6033  | 233.9978  | 327.3715  |
|                                   | H | 3.883412  | -0.380836 | 0.000628  | 374.7601  | 512.2669  | 568.1366  |
|                                   | H | 2.313879  | -1.460189 | 0.00058   | 721.6558  | 723.4588  | 1016.0002 |
|                                   | N | -1.404814 | -0.229047 | -0.000207 | 1206.5644 | 1247.6116 | 1396.502  |
|                                   | O | -1.861126 | 1.043834  | 0.000372  | 1478.4396 | 1812.3217 | 1835.3947 |
|                                   | O | -2.240084 | -1.039624 | 0.000049  | 3040.3908 | 3154.6059 | 3692.3565 |
|                                   | H | -1.009976 | 1.519086  | 0.000144  |           |           |           |
| HCHO                              | O | 0.670471  | 0.000248  | 0.000034  |           |           |           |
|                                   | C | -0.525546 | 0.000027  | -0.000138 | 1213.2946 | 1273.5648 | 1539.6997 |
|                                   | H | -1.10717  | 0.937403  | 0.000278  | 1869.1092 | 2945.9741 | 3016.5118 |
|                                   | H | -1.103322 | -0.939547 | 0.000278  |           |           |           |
| HNO3                              | O | -1.050351 | -0.725557 | -0.000079 |           |           |           |
|                                   | N | -0.141242 | 0.034996  | 0.000196  | 504.13    | 620.9047  | 705.7992  |
|                                   | O | 1.101539  | -0.564498 | -0.00001  | 825.1482  | 981.6791  | 1357.703  |
|                                   | O | -0.142124 | 1.236269  | -0.000051 | 1415.7119 | 1809.3066 | 3783.6212 |
|                                   | H | 1.716189  | 0.185323  | -0.000258 |           |           |           |
|                                   | O | 1.432993  | -1.144409 | 0.153765  | 29.3392   | 89.2185   | 105.997   |
|                                   | O | 1.983689  | -0.052822 | -0.463434 | 156.3452  | 166.5127  | 258.9553  |
|                                   | C | 1.875536  | 1.03995   | 0.100942  | 539.422   | 694.0269  | 764.4053  |

Table S1 continued from previous page

|                                   |   |           |           |           |            |           |           |
|-----------------------------------|---|-----------|-----------|-----------|------------|-----------|-----------|
|                                   | H | 2.309294  | 1.881652  | -0.424708 | 888.5999   | 964.2469  | 1041.582  |
|                                   | H | 1.369229  | 1.102514  | 1.05852   | 1090.8326  | 1266.752  | 1439.2134 |
|                                   | N | -1.880012 | -0.369376 | -0.242632 | 1459.3304  | 1664.7057 | 1806.2324 |
|                                   | O | -0.830421 | 0.084835  | 0.506977  | 3091.3709  | 3135.9082 | 3281.578  |
|                                   | H | -0.095611 | -0.583808 | 0.382315  |            |           |           |
|                                   | O | -2.795766 | 0.355592  | -0.187728 |            |           |           |
| TS <sub>trans</sub> <sup>hs</sup> | O | 1.582003  | -1.021811 | -0.042146 | -1071.0071 | 57.8207   | 110.3758  |
|                                   | O | 1.569857  | 0.291382  | -0.572465 | 130.6253   | 255.3153  | 405.6495  |
|                                   | C | 1.104964  | 1.084455  | 0.277433  | 479.5819   | 621.8228  | 773.964   |
|                                   | H | 0.822815  | 2.061778  | -0.099803 | 879.6014   | 912.1277  | 978.7652  |
|                                   | H | 1.175843  | 0.863263  | 1.333267  | 1164.654   | 1246.6493 | 1400.8277 |
|                                   | N | -1.582704 | -0.514879 | -0.192657 | 1442.731   | 1621.4702 | 1740.5933 |
|                                   | O | -0.553739 | -0.260552 | 0.643717  | 1863.0243  | 3150.3641 | 3289.2795 |
|                                   | H | 0.427111  | -0.924012 | 0.337371  |            |           |           |
|                                   | O | -2.3452   | 0.378031  | -0.26496  |            |           |           |
| HPM                               | O | 1.122473  | 0.220369  | -0.081359 | 192.4534   | 289.6468  | 506.4185  |
|                                   | O | -0.06306  | -0.558593 | -0.06483  | 686.0443   | 960.1216  | 1188.2997 |
|                                   | C | -1.129966 | 0.262803  | 0.092831  | 1230.4988  | 1407.8125 | 1448.5031 |
|                                   | H | -2.054352 | -0.293563 | 0.09391   | 3159.9578  | 3300.2288 | 3802.0732 |
|                                   | H | -1.047423 | 1.256255  | -0.322319 |            |           |           |
|                                   | H | 1.406265  | 0.166279  | 0.840936  |            |           |           |
| NO <sub>2</sub>                   | N | 0         | 0         | 0.314204  | 783.2825   | 1465.2372 | 1776.0132 |
|                                   | O | 0         | 1.090359  | -0.137464 |            |           |           |

Table S1 continued from previous page

|                                   |   |           |           |           |           |           |           |
|-----------------------------------|---|-----------|-----------|-----------|-----------|-----------|-----------|
|                                   | O | 0         | -1.090359 | -0.137464 |           |           |           |
| TS <sub>cis</sub> <sup>oz</sup>   | O | -1.169711 | -0.826679 | 0.618842  | -313.037  | 174.6028  | 299.2654  |
|                                   | O | -1.491277 | 0.260938  | -0.10866  | 361.8911  | 385.6796  | 477.9411  |
|                                   | C | -0.495811 | 1.128652  | -0.075574 | 626.2789  | 656.696   | 689.5726  |
|                                   | O | 0.402961  | -0.991279 | -0.643789 | 939.2824  | 995.8639  | 1056.627  |
|                                   | H | -0.626149 | 1.919735  | -0.80322  | 1192.8857 | 1250.0115 | 1303.142  |
|                                   | H | -0.12531  | 1.400539  | 0.906528  | 1379.5712 | 1498.8799 | 1544.8227 |
|                                   | O | 1.785299  | 0.257327  | 0.498908  | 3140.7424 | 3251.1331 | 3739.2324 |
|                                   | H | 1.813171  | -0.615989 | 0.923293  |           |           |           |
|                                   | N | 0.813568  | 0.131621  | -0.499366 |           |           |           |
| TS <sub>trans</sub> <sup>oz</sup> | O | -1.255134 | -0.747618 | 0.625401  | -385.7238 | 187.6112  | 286.1722  |
|                                   | O | -1.492305 | 0.325742  | -0.147628 | 349.0737  | 368.0907  | 482.4623  |
|                                   | C | -0.467592 | 1.139702  | -0.092774 | 627.4475  | 639.5433  | 677.844   |
|                                   | O | 0.333685  | -1.066925 | -0.537496 | 892.3763  | 993.7424  | 1025.6584 |
|                                   | H | -0.530296 | 1.936327  | -0.823055 | 1173.502  | 1253.6995 | 1313.4213 |
|                                   | H | -0.074422 | 1.355028  | 0.894457  | 1322.2866 | 1501.8346 | 1541.4953 |
|                                   | O | 1.80852   | 0.105156  | 0.533071  | 3138.7109 | 3257.475  | 3832.9636 |
|                                   | N | 0.833655  | 0.021366  | -0.504293 |           |           |           |
|                                   | H | 2.41655   | 0.790033  | 0.228509  |           |           |           |
| PC <sub>cis</sub> <sup>oz</sup>   | O | -1.246511 | -0.656991 | 0.335863  | 180.939   | 299.1682  | 393.4956  |
|                                   | O | -0.988417 | 0.701446  | 0.515746  | 467.6818  | 543.2712  | 601.5881  |
|                                   | C | -0.155993 | 1.025015  | -0.580881 | 768.2604  | 847.1728  | 864.5643  |
|                                   | O | -0.017442 | -1.137467 | -0.460047 | 985.3601  | 1007.5648 | 1083.976  |

Table S1 continued from previous page

|                                   |   |           |           |           |           |           |           |
|-----------------------------------|---|-----------|-----------|-----------|-----------|-----------|-----------|
|                                   | H | -0.695777 | 0.987672  | -1.524708 | 1133.1579 | 1171.2588 | 1265.9597 |
|                                   | H | 0.328268  | 1.972469  | -0.37825  | 1352.427  | 1437.5683 | 1490.5777 |
|                                   | O | 1.598338  | 0.016583  | 0.590233  | 3121.2006 | 3224.6477 | 3734.248  |
|                                   | H | 1.001583  | 0.083689  | 1.352781  |           |           |           |
|                                   | N | 0.790592  | -0.083212 | -0.545557 |           |           |           |
| PC <sup>oz</sup> <sub>trans</sub> | O | -0.944568 | -0.841633 | 0.495968  | 129.5591  | 330.6492  | 360.3559  |
|                                   | O | -1.445638 | 0.411317  | 0.120286  | 472.2821  | 627.7054  | 710.4092  |
|                                   | C | -0.268564 | 1.14866   | -0.135062 | 758.3039  | 858.6207  | 909.6464  |
|                                   | O | 0.019079  | -1.027802 | -0.557535 | 965.9493  | 998.1502  | 1056.1032 |
|                                   | H | -0.483894 | 1.825226  | -0.955683 | 1092.9776 | 1141.6074 | 1244.2275 |
|                                   | H | 0.110262  | 1.653857  | 0.749934  | 1375.6309 | 1410.9572 | 1515.5407 |
|                                   | O | 1.659386  | 0.076247  | 0.527097  | 3116.1606 | 3193.7616 | 3859.8178 |
|                                   | N | 0.744311  | 0.132123  | -0.540574 |           |           |           |
|                                   | H | 2.468768  | -0.240942 | 0.113609  |           |           |           |
| TS1 <sup>ca</sup> <sub>cis</sub>  | C | -1.193309 | -0.732285 | 0.526828  | -367.5155 | 141.3451  | 270.458   |
|                                   | O | -1.513976 | 0.28228   | -0.167922 | 351.308   | 428.2711  | 474.1935  |
|                                   | O | -0.572526 | 1.24461   | -0.054018 | 591.6537  | 637.8505  | 699.5947  |
|                                   | O | 0.431106  | -1.020822 | -0.51681  | 865.0216  | 971.1415  | 1023.3895 |
|                                   | H | -0.638254 | -0.573151 | 1.44158   | 1098.2192 | 1244.5385 | 1307.2821 |
|                                   | H | -1.789375 | -1.618171 | 0.355598  | 1394.0551 | 1488.8243 | 1556.6298 |
|                                   | O | 1.778101  | 0.307701  | 0.498103  | 3157.2873 | 3291.5989 | 3712.5521 |
|                                   | H | 1.676692  | -0.459135 | 1.086744  |           |           |           |
|                                   | N | 0.989879  | 0.076288  | -0.588531 |           |           |           |

Table S1 continued from previous page

|                                    |   |           |           |           |           |           |           |
|------------------------------------|---|-----------|-----------|-----------|-----------|-----------|-----------|
| TS1 <sup>ca</sup> <sub>trans</sub> | C | -1.108856 | -0.695899 | 0.601221  | -1113.325 | 77.471    | 92.6719   |
|                                    | O | -1.500513 | 0.264554  | -0.139468 | 263.1243  | 378.7331  | 478.4219  |
|                                    | O | -0.575397 | 1.253324  | -0.167263 | 525.5072  | 632.3669  | 687.7438  |
|                                    | O | 0.393726  | -1.060499 | -0.535039 | 736.1341  | 817.8758  | 973.217   |
|                                    | H | -0.468922 | -0.474288 | 1.445246  | 1030.2393 | 1209.814  | 1369.2895 |
|                                    | H | -1.718078 | -1.587801 | 0.546697  | 1383.147  | 1609.6928 | 1785.9188 |
|                                    | O | 1.661779  | 0.191572  | 0.600465  | 2296.033  | 2983.8823 | 3786.7627 |
|                                    | N | 0.996342  | -0.005008 | -0.59755  |           |           |           |
|                                    | H | 2.028983  | 1.080938  | 0.514028  |           |           |           |
| RC <sup>ca</sup> <sub>cis</sub>    | C | -1.132588 | -0.645981 | 0.397835  | 59.0392   | 299.3377  | 383.6305  |
|                                    | O | -1.351938 | 0.666959  | -0.025851 | 516.6965  | 578.7609  | 724.9457  |
|                                    | O | -0.024809 | 1.149766  | -0.055179 | 761.9152  | 848.8385  | 915.0769  |
|                                    | O | -0.074181 | -1.06385  | -0.440402 | 978.9984  | 1051.1897 | 1061.0284 |
|                                    | H | -0.855498 | -0.675265 | 1.46068   | 1115.5714 | 1178.3765 | 1254.6815 |
|                                    | H | -2.012052 | -1.247156 | 0.173391  | 1381.773  | 1431.5154 | 1527.1454 |
|                                    | O | 1.790029  | -0.059566 | 0.362478  | 3056.2538 | 3205.956  | 3716.9294 |
|                                    | H | 1.389021  | -0.022776 | 1.250754  |           |           |           |
|                                    | N | 0.794464  | 0.03923   | -0.571458 |           |           |           |
| RC <sup>ca</sup> <sub>trans</sub>  | C | -1.324897 | -0.469382 | 0.223056  | 107.2895  | 212.9709  | 298.3223  |
|                                    | O | -0.91601  | 0.839941  | 0.476016  | 530.7612  | 623.8235  | 767.1895  |
|                                    | O | 0.038221  | 1.018898  | -0.592956 | 795.5407  | 903.7279  | 947.8626  |
|                                    | O | -0.176176 | -1.115003 | -0.348056 | 968.2356  | 1002.6835 | 1010.8969 |
|                                    | H | -1.581778 | -0.927566 | 1.175138  | 1120.1252 | 1152.2812 | 1225.2681 |
|                                    | H | -2.131327 | -0.516396 | -0.509818 | 1399.7619 | 1417.7264 | 1539.1563 |



Table S1 continued from previous page

|                                    |   |           |           |           |            |           |           |
|------------------------------------|---|-----------|-----------|-----------|------------|-----------|-----------|
|                                    | O | 1.524923  | -0.087369 | 0.644687  | 3079.5124  | 3163.7105 | 3861.0393 |
|                                    | N | 0.780093  | -0.125431 | -0.538588 |            |           |           |
|                                    | H | 2.434166  | -0.113472 | 0.328928  |            |           |           |
| TS2 <sup>ca</sup> <sub>cis</sub>   | C | -1.506308 | 0.077121  | -0.216413 | -1137.6637 | 50.1784   | 109.5879  |
|                                    | O | -1.523422 | -0.595192 | 0.81384   | 297.5107   | 361.0129  | 405.5849  |
|                                    | O | 1.619841  | 0.405525  | 0.772555  | 492.4626   | 625.8035  | 711.9467  |
|                                    | O | -0.372976 | 1.030192  | -0.432235 | 757.7987   | 845.6208  | 996.738   |
|                                    | H | -1.806239 | -0.334641 | -1.190516 | 1065.5912  | 1203.329  | 1375.2071 |
|                                    | H | -1.893109 | 1.209762  | -0.163132 | 1410.8533  | 1601.6868 | 1730.4316 |
|                                    | O | 0.85136   | -1.015205 | -0.652776 | 2278.748   | 3008.0692 | 3643.8017 |
|                                    | H | 1.125286  | -1.601257 | 0.081045  |            |           |           |
|                                    | N | 1.001927  | 0.237265  | -0.205714 |            |           |           |
| TS2 <sup>ca</sup> <sub>trans</sub> | C | -1.368622 | -0.462549 | 0.222691  | -1113.325  | 77.471    | 92.6719   |
|                                    | O | -1.71467  | 0.694851  | 0.443207  | 263.1243   | 378.7331  | 478.4219  |
|                                    | O | 0.861349  | 1.258171  | -0.231827 | 525.5072   | 632.3669  | 687.7438  |
|                                    | O | -0.359605 | -0.704437 | -0.855492 | 736.1341   | 817.8758  | 973.217   |
|                                    | H | -1.194384 | -1.178896 | 1.040976  | 1030.2393  | 1209.814  | 1369.2895 |
|                                    | H | -1.873053 | -1.05911  | -0.680633 | 1383.147   | 1609.6928 | 1785.9188 |
|                                    | O | 1.58697   | -0.535239 | 0.685142  | 2296.033   | 2983.8823 | 3786.7627 |
|                                    | N | 0.959744  | 0.110729  | -0.349771 |            |           |           |
|                                    | H | 1.568606  | -1.468577 | 0.423671  |            |           |           |
| FA                                 | C | -0.132538 | 0.360397  | 0.000077  | 516.234    | 674.3734  | 1056.6952 |
|                                    | O | -1.167903 | -0.219752 | 0.000032  | 1141.1362  | 1289.6114 | 1430.4637 |

Table S1 continued from previous page

|   |           |           |           |          |           |           |
|---|-----------|-----------|-----------|----------|-----------|-----------|
| O | 1.051094  | -0.277267 | -0.000131 | 1909.948 | 3024.6264 | 3864.7757 |
| H | -0.046287 | 1.457713  | -0.000475 |          |           |           |
| H | 1.775988  | 0.356057  | 0.000811  |          |           |           |

Table S2: Absolute energy for the relevant species of CH<sub>2</sub>OO + HONO reaction estimated at CCSD(T)/aug-cc-pVTZ//M06-2X/aug-cc-pVTZ level of theory

| Species                            | Energy in Hartree |
|------------------------------------|-------------------|
| CH <sub>2</sub> OO                 | -189.3306315      |
| Cis-HONO                           | -205.4504807      |
| Trans-HONO                         | -205.4511513      |
| NO <sub>2</sub>                    | -204.8160967      |
| FA                                 | -189.5107133      |
| CH <sub>2</sub> O                  | -114.3425655      |
| HNO <sub>3</sub>                   | -280.5440445      |
| HPM                                | -394.8591518      |
| TS <sub>trans</sub> <sup>ha</sup>  | -394.7802752      |
| TS1 <sub>cis</sub> <sup>ca</sup>   | -394.7722702      |
| TS1 <sub>cis</sub> <sup>ca</sup>   | -394.7754658      |
| TS1 <sub>trans</sub> <sup>ca</sup> | -394.7795863      |
| TS1 <sub>trans</sub> <sup>ca</sup> | -394.7763635      |
| TS <sub>cis</sub> <sup>ot</sup>    | -394.7559786      |
| TS <sub>trans</sub> <sup>ot</sup>  | -394.7660783      |
| TS <sub>cis</sub> <sup>oz</sup>    | -394.7711454      |
| TS <sub>trans</sub> <sup>oz</sup>  | -394.7655403      |
| RC <sub>trans</sub> <sup>ha</sup>  | -394.7984774      |
| RC <sub>cis</sub> <sup>ca</sup>    | -394.803633       |
| RC <sub>trans</sub> <sup>ca</sup>  | -394.8136505      |
| PC <sub>cis</sub> <sup>oz</sup>    | -394.7757968      |
| PC <sub>trans</sub> <sup>oz</sup>  | -394.7742122      |

Table S3: ZCT tunneling coefficient for CH<sub>2</sub>OO+HONO reaction within the temperature range of 213-320 K.

| Temp (K) | trans-HONO    |               |               |               | cis-HONO      |               |               |
|----------|---------------|---------------|---------------|---------------|---------------|---------------|---------------|
|          | $\kappa_{ot}$ | $\kappa_{oz}$ | $\kappa_{ca}$ | $\kappa_{ha}$ | $\kappa_{ot}$ | $\kappa_{oz}$ | $\kappa_{ca}$ |
| 213      | 2.38          | 1.27          | 1.83          | 13.00         | 2.70          | 1.13          | 1.42          |
| 216      | 2.31          | 1.26          | 1.80          | 11.80         | 2.61          | 1.13          | 1.40          |
| 219      | 2.25          | 1.25          | 1.77          | 10.70         | 2.52          | 1.12          | 1.39          |
| 224      | 2.16          | 1.24          | 1.72          | 9.31          | 2.40          | 1.12          | 1.37          |
| 235      | 1.99          | 1.21          | 1.63          | 7.10          | 2.19          | 1.11          | 1.33          |
| 250      | 1.82          | 1.18          | 1.54          | 5.30          | 1.97          | 1.09          | 1.28          |
| 259      | 1.74          | 1.17          | 1.49          | 4.59          | 1.87          | 1.09          | 1.26          |
| 280      | 1.59          | 1.14          | 1.40          | 3.51          | 1.69          | 1.07          | 1.22          |
| 290      | 1.54          | 1.13          | 1.37          | 3.17          | 1.62          | 1.07          | 1.20          |
| 298      | 1.50          | 1.13          | 1.35          | 2.95          | 1.58          | 1.06          | 1.19          |
| 300      | 1.49          | 1.12          | 1.34          | 2.90          | 1.57          | 1.06          | 1.19          |
| 310      | 1.45          | 1.12          | 1.32          | 2.68          | 1.52          | 1.06          | 1.17          |
| 320      | 1.42          | 1.11          | 1.29          | 2.50          | 1.48          | 1.06          | 1.16          |

Table S4: T1-Diagnostic values for the different TS involved in the CH<sub>2</sub>OO + HONO reaction, calculated at CCSD(T)/aug-cc-pVTZ level of theory.

| Species                           | T1-Diagnostic |
|-----------------------------------|---------------|
| TS <sub>ha</sub> <sup>trans</sup> | 0.026         |
| TS <sub>ot</sub> <sup>cis</sup>   | 0.027         |
| TS <sub>ot</sub> <sup>trans</sup> | 0.027         |
| TS <sub>oz</sub> <sup>cis</sup>   | 0.031         |
| TS <sub>oz</sub> <sup>trans</sup> | 0.030         |
| TS <sub>ca</sub> <sup>cis</sup>   | 0.033         |
| TS <sub>ca</sub> <sup>trans</sup> | 0.032         |

# 1 post-CCSD(T) calculation

To check the accuracy of CCSD(T)/aug-cc-pVTZ method, we have calculate the full CCSDT calculation for the TS of HAT reaction. The contribution accounted for the full triple excitation ( $\Delta E_T$ ) at CCSDT/cc-PVDZ level of theory calculated using MRCC<sup>1</sup> code can be expressed as follows.

$$\Delta E_T = E_{CCSDT} - E_{CCSD(T)} \quad (1)$$

and the final energy barrier can be expressed as below

$$\Delta E_{Final} = \Delta E_T + \Delta E_{CCSD(T)/aug-cc-pVTZ} \quad (2)$$

Table S5: Comparison of the energies of the HAT reaction obtained after including full T correction with the energies obtained at CCSD(T)/aug-cc-pVTZ level of theory.

| species                 | $\Delta E_{CCSD(T)/aug-cc-pVTZ}$ | $\Delta E_T$ | $\Delta E_{Final}$ |
|-------------------------|----------------------------------|--------------|--------------------|
| CH <sub>2</sub> OO+HONO | 0.00                             | 0.00         | 0.00               |
| TS <sub>ha</sub>        | 0.11                             | 0.29         | 0.40               |

Table S6: Equilibrium constants for the cis-trans-isomerization of HONO

| Temp (K) | $K_{eq-HONO}$         |
|----------|-----------------------|
| 213      | $3.74 \times 10^{-1}$ |
| 216      | $3.79 \times 10^{-1}$ |
| 219      | $3.83 \times 10^{-1}$ |
| 224      | $3.91 \times 10^{-1}$ |
| 235      | $4.08 \times 10^{-1}$ |
| 250      | $4.29 \times 10^{-1}$ |
| 259      | $4.41 \times 10^{-1}$ |
| 280      | $4.66 \times 10^{-1}$ |
| 290      | $4.77 \times 10^{-1}$ |
| 298      | $4.86 \times 10^{-1}$ |
| 300      | $4.88 \times 10^{-1}$ |
| 310      | $4.98 \times 10^{-1}$ |
| 320      | $5.07 \times 10^{-1}$ |

## 2 Effective rate constant for HAT reaction.

The general expression for the HAT reaction can be expressed as follows.

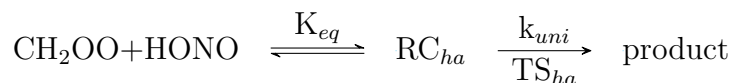

As the HONO exist in cis and trans form, the reaction can proceed through both the isomers and the overall rate can be expressed as follows.

$$\nu = k_{bi}^{cis}[\text{CH}_2\text{OO}][cis - \text{HONO}] + k_{bi}^{trans}[\text{CH}_2\text{OO}][trans - \text{HONO}] \quad (3)$$

for the HAT reaction  $k_{bi}^{cis}$  is zero, therefore

$$\nu = k_{bi}^{trans}[\text{CH}_2\text{OO}][trans - \text{HONO}] \quad (4)$$

However, two conformers of HONO are almost degenerate so that an equilibrium can be established between cis-HONO and trans-HONO in the atmosphere through

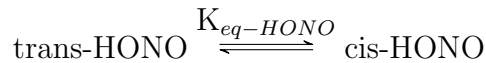

and the  $K_{eq-HONO}$  can be expressed as follows

$$K_{eq-HONO} = \frac{[cis - HONO]}{[trans - HONO]} \quad (5)$$

Taking into account this equilibrium, and considering the whole concentration of nitrous acid as

$$[HONO] = [cis - HONO] + [trans - HONO] \quad (6)$$

The reaction rate (4) can be written as

$$\nu = \frac{k_{bi}^{trans}}{1 + K_{eq-HONO}} [CH_2OO][HONO] = k_{eff}^{ha} [CH_2OO][HONO] \quad (7)$$

where

$$k_{eff}^{ha} = \frac{k_{bi}^{trans}}{1 + K_{eq-HONO}} \quad (8)$$

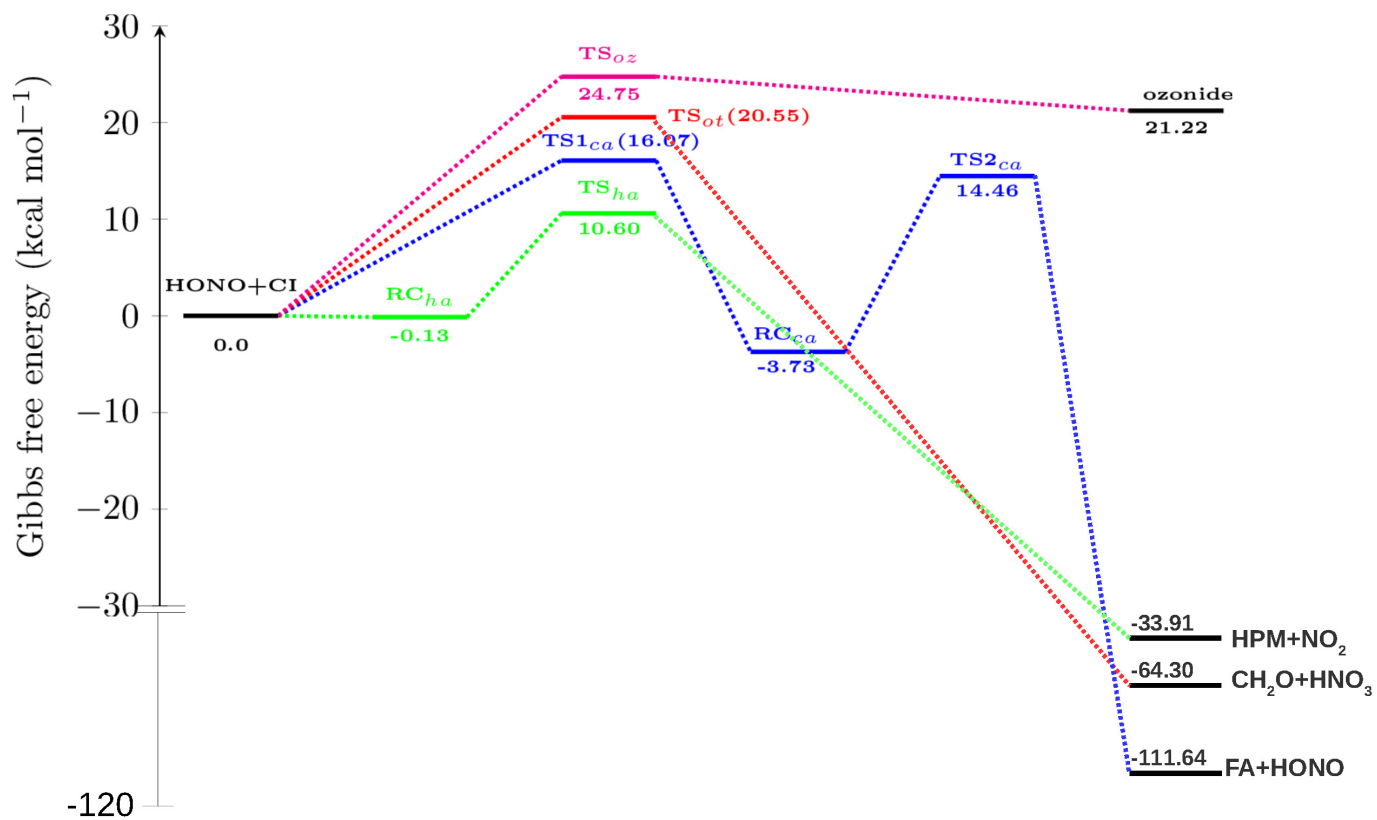

Figure S1: Gibbs free energy profile for CH<sub>2</sub>OO + trans-HONO reaction, calculated at CCSD(T)/aug-cc-pVTZ//M06-2X/aug-cc-pVTZ level of theory.

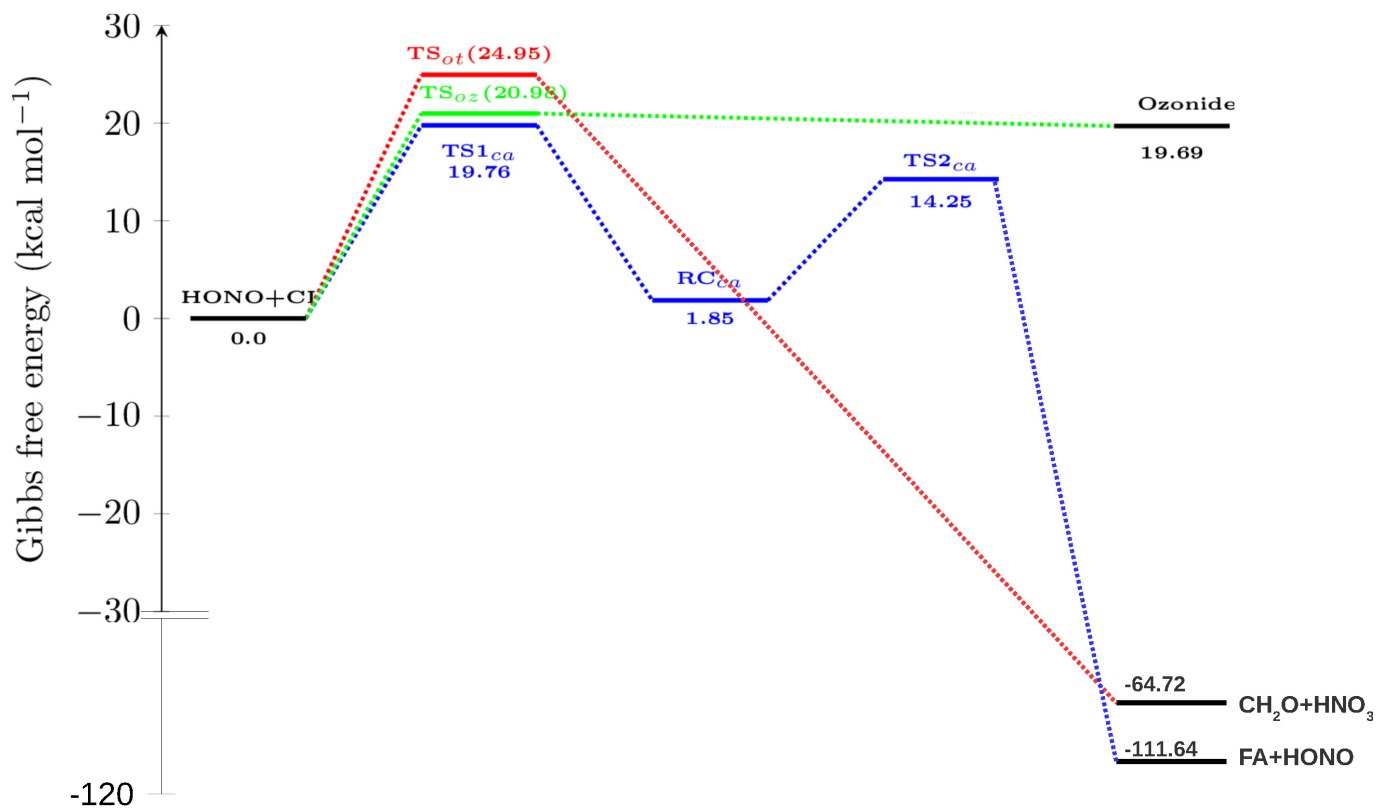

Figure S2: Gibbs free energy profile for  $\text{CH}_2\text{OO} + \text{cis-HONO}$  reaction, calculated at CCSD(T)/aug-cc-pVTZ//M06-2X/aug-cc-pVTZ level of theory.



## References

- (1) Kállay, M.; Rolik, Z.; Csontos, J.; Ladjánszki, I.; Szegedy, L.; Ladóczki, B.; Samu, G.; Petrov, K.; Farkas, M.; Nagy, *URL: <http://www.mrcc.hu>, accessed August 26th 2016,*
